# Supplementary material for: Dietary Beta-Hydroxy-Beta-Methyl Butyrate Supplementation Inhibits Hepatic Fat Deposition via Regulating Gut Microbiota in Broiler Chickens
Source: MDPI journal article supplement (doi:10.3390/microorganisms10010169), 2022-01-13
Supplement: s1 [file s1]

**Supplementary Table S1.** Composition and nutrient content of basal diets of broilers (air-dry basis, %)

| Item                         | Starter phase | Grower phase |
|------------------------------|---------------|--------------|
|                              | d 1 to 21     | d 22 to 51   |
| Ingredients, %               |               |              |
| Corn                         | 56.49         | 63.45        |
| Soybean meal                 | 29.63         | 26.63        |
| Corn gluten meal             | 0.70          | 0.32         |
| Wheat bran                   | 4.60          | 1.00         |
| Soybean oil                  | 4.40          | 4.00         |
| L-Lysine HCl                 | 0.26          | 0.26         |
| DL-methionine                | 0.29          | 0.38         |
| Threonine                    | 0.09          | 0.10         |
| Calcium hydrogen phosphate   | 1.70          | 2.00         |
| Limestone                    | 1.36          | 1.36         |
| Premix <sup>1</sup>          | 0.48          | 0.50         |
| Nutrients (calculated value) |               |              |
| ME, MJ/kg                    | 12.54         | 12.78        |
| Crude protein                | 19.38         | 17.94        |
| Calcium                      | 1.00          | 1.05         |
| Total phosphorus             | 0.66          | 0.68         |
| Lysine                       | 1.16          | 1.08         |
| Methionine                   | 0.59          | 0.66         |
| Methionine+cystine           | 0.92          | 0.96         |

<sup>1</sup> The premix provided per kilogram of diet: Vitamin A 12,500 IU; Vitamin D<sub>3</sub> 2,500 IU; Vitamin E 18.75 mg; Vitamin K<sub>3</sub> 2.65 mg; Vitamin B<sub>1</sub> 2 mg; Vitamin B<sub>2</sub> 6 mg; Vitamin B<sub>12</sub> 25 µg; pantothenic acid 12 mg; nicotinic acid 50 mg; biotin 32.5 µg; folic acid 1.25 mg; iron 80 mg; zinc 75 mg; manganese 100 mg; iodine 0.35 mg; copper 8 mg; selenium 0.15 mg.

**Supplementary Table S2.** Effects of HMB on valid reads of microbiota.

| #Sample_name | Valid_reads(#) | AvgLen(nt) | Base(nt) | Q30   | Q20   |
|--------------|----------------|------------|----------|-------|-------|
| Con1         | 70489          | 420        | 29606576 | 94.13 | 98.01 |
| Con2         | 70011          | 413        | 28921786 | 93.55 | 97.76 |
| Con3         | 71824          | 413        | 29679463 | 93.43 | 97.70 |
| Con4         | 53713          | 414        | 22242389 | 93.55 | 97.78 |
| Con5         | 72155          | 420        | 30299565 | 93.53 | 97.60 |
| Con6         | 74971          | 420        | 31454006 | 93.14 | 97.58 |
| Con7         | 68861          | 417        | 28700631 | 93.55 | 97.74 |
| Con8         | 67461          | 417        | 28700631 | 93.55 | 97.74 |
| HMB0.5%-1    | 70726          | 420        | 29674818 | 93.98 | 97.92 |
| HMB0.5%-2    | 71196          | 419        | 29813809 | 93.37 | 97.53 |
| HMB0.5%-3    | 67251          | 418        | 28105361 | 93.72 | 97.85 |
| HMB0.5%-4    | 72625          | 415        | 30108802 | 93.65 | 97.80 |
| HMB0.5%-5    | 50638          | 416        | 21061527 | 93.69 | 97.86 |
| HMB0.5%-6    | 74950          | 419        | 31393628 | 93.38 | 97.66 |
| HMB0.5%-7    | 67898          | 418        | 28359658 | 93.63 | 97.77 |
| HMB0.5%-8    | 68938          | 418        | 28359658 | 93.63 | 97.77 |
| HMB1.0%-1    | 70774          | 417        | 29499725 | 93.52 | 97.56 |
| HMB1.0%-2    | 70217          | 418        | 29364633 | 93.36 | 97.66 |
| HMB1.0%-3    | 69565          | 418        | 29076645 | 93.95 | 97.89 |
| HMB1.0%-4    | 62434          | 416        | 25958340 | 93.12 | 97.60 |
| HMB1.0%-5    | 57158          | 415        | 23728143 | 93.51 | 97.75 |
| HMB1.0%-6    | 67953          | 419        | 28478148 | 93.04 | 97.55 |
| HMB1.0%-7    | 66350          | 417        | 27684272 | 93.42 | 97.67 |
| HMB1.0%-8    | 65010          | 417        | 27684272 | 93.42 | 97.67 |
| HMB1.5%-1    | 69271          | 412        | 28523691 | 93.94 | 97.96 |
| HMB1.5%-2    | 73600          | 420        | 30886020 | 94.35 | 98.09 |
| HMB1.5%-3    | 73707          | 418        | 30784718 | 93.42 | 97.73 |
| HMB1.5%-4    | 69653          | 418        | 29098458 | 93.15 | 97.44 |
| HMB1.5%-5    | 70540          | 414        | 29178205 | 93.30 | 97.66 |
| HMB1.5%-6    | 59876          | 414        | 24774283 | 93.89 | 97.93 |
| HMB1.5%-7    | 69441          | 416        | 28874229 | 93.67 | 97.80 |
| HMB1.5%-8    | 71145          | 416        | 28874229 | 93.67 | 97.80 |
